# Supplementary material for: Determining the genetic basis of anthracycline-cardiotoxicity by molecular response QTL mapping in induced cardiomyocytes
Source: eLife journal article supplement (doi:10.7554/elife.33480), 2018-05-07

Relative Gene Expression

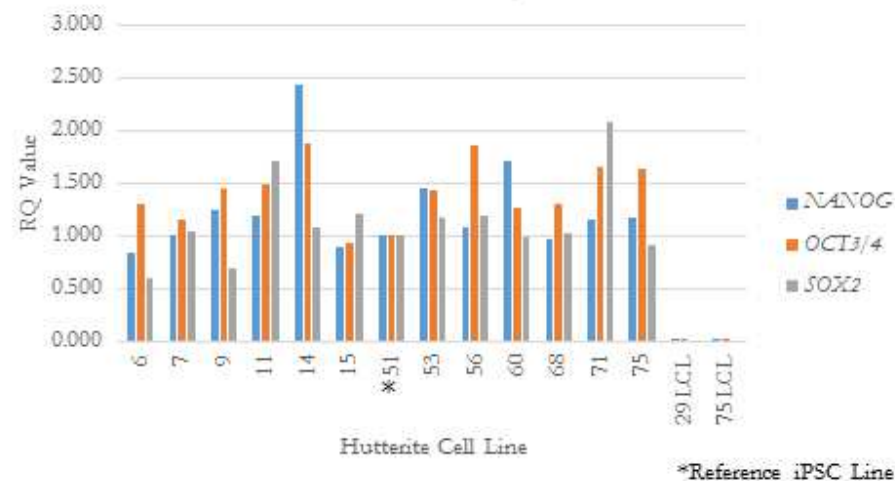

Relative Gene Expression

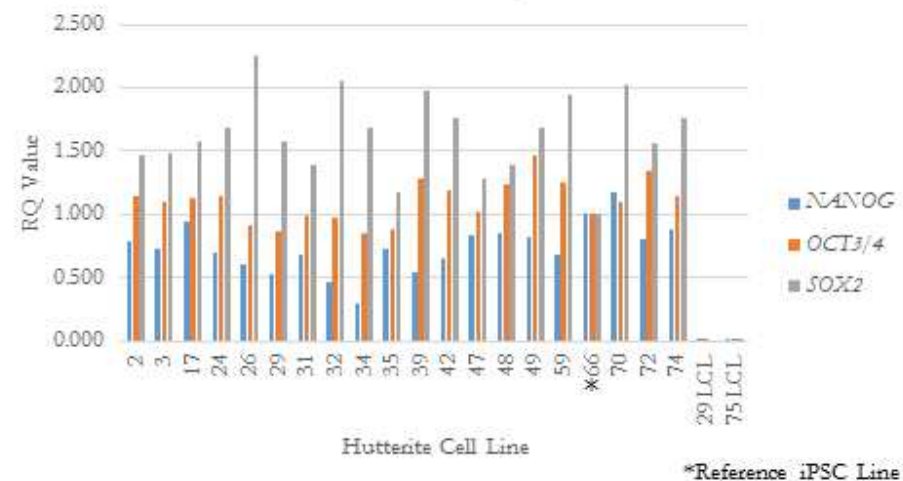

Relative Gene Expression

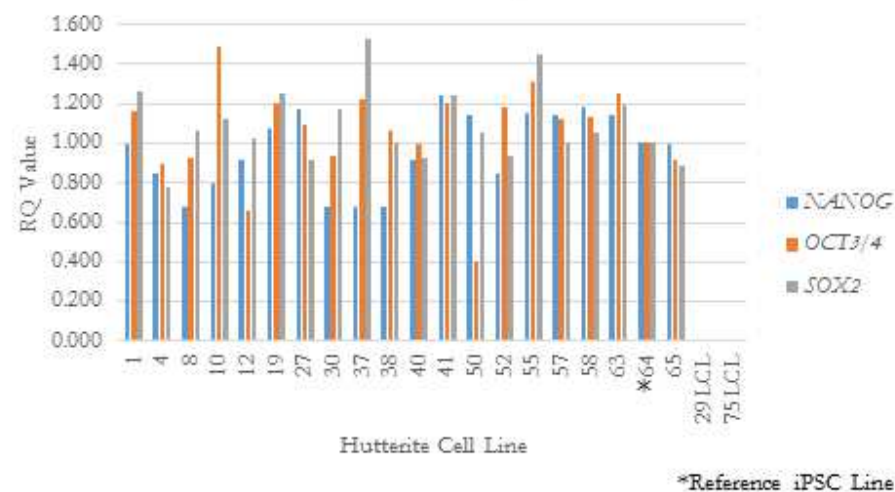

Relative Gene Expression

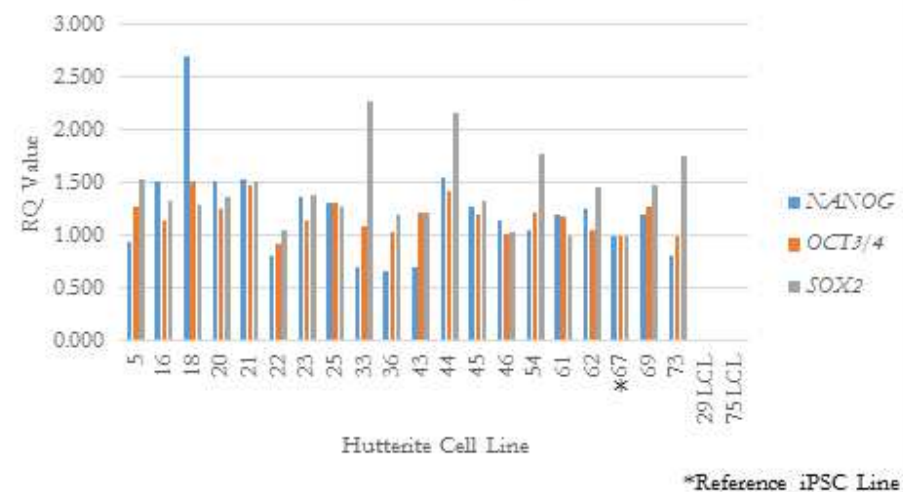

Supplement: supp [file elife-33480-supp-v1.zip]
