# Supplementary material for: Determining the genetic basis of anthracycline-cardiotoxicity by molecular response QTL mapping in induced cardiomyocytes
Source: eLife journal article supplement (doi:10.7554/elife.33480), 2018-05-07
Supplement: supp [file elife-33480-supp-v1.zip]

Response eQTL  $p=5e-07$ 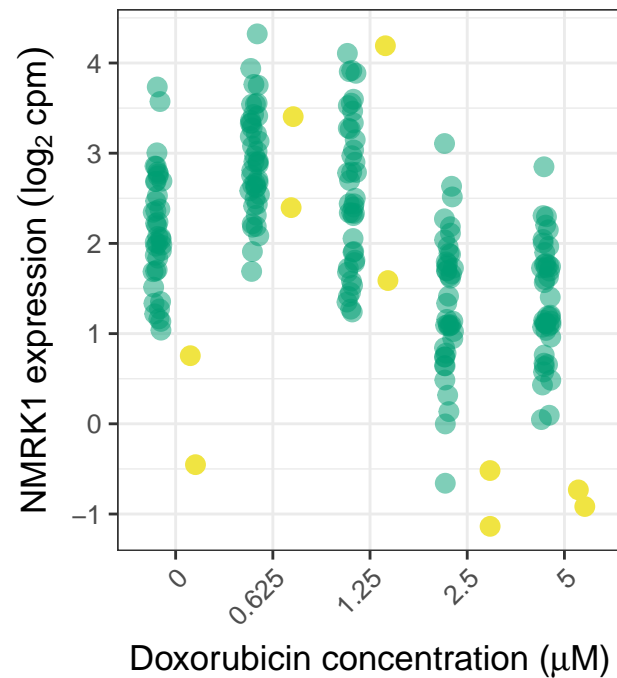Response eQTL  $p=0.005$ 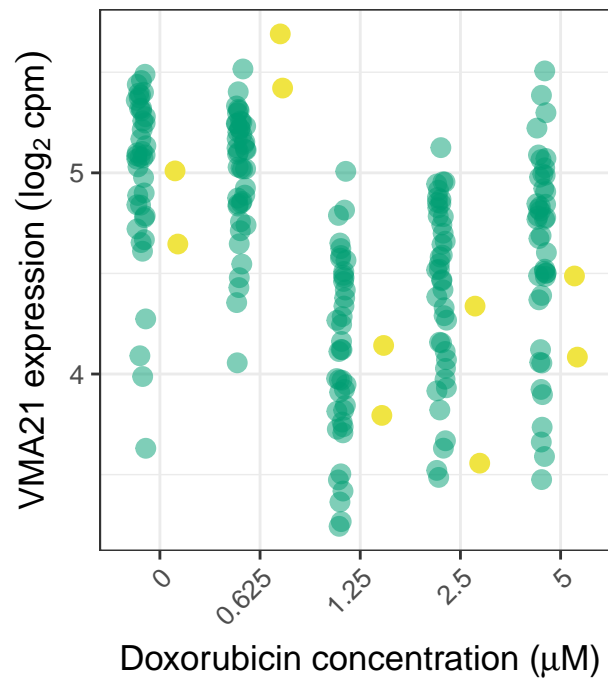Response eQTL  $p=0.01$ 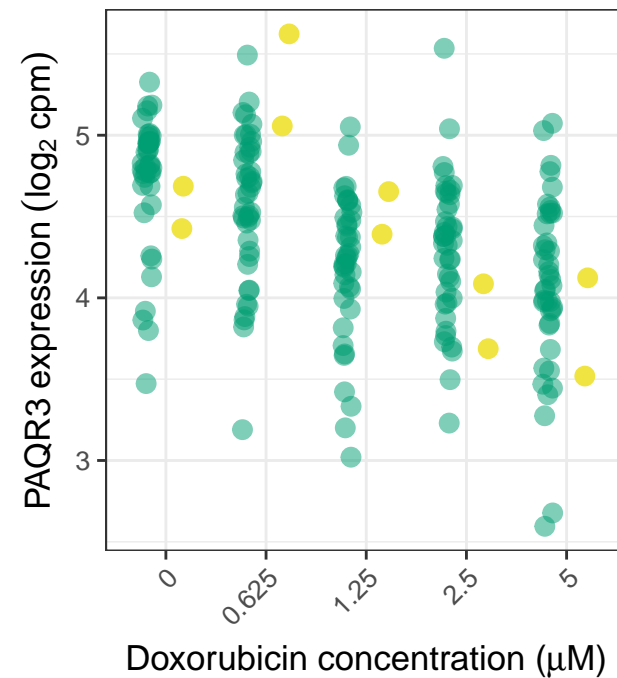Response eQTL  $p=0.03$ 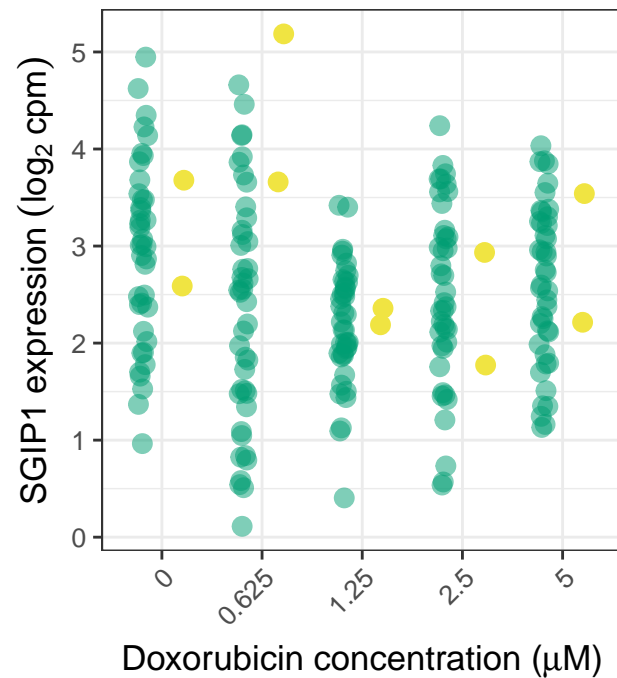Response eQTL  $p=0.05$ 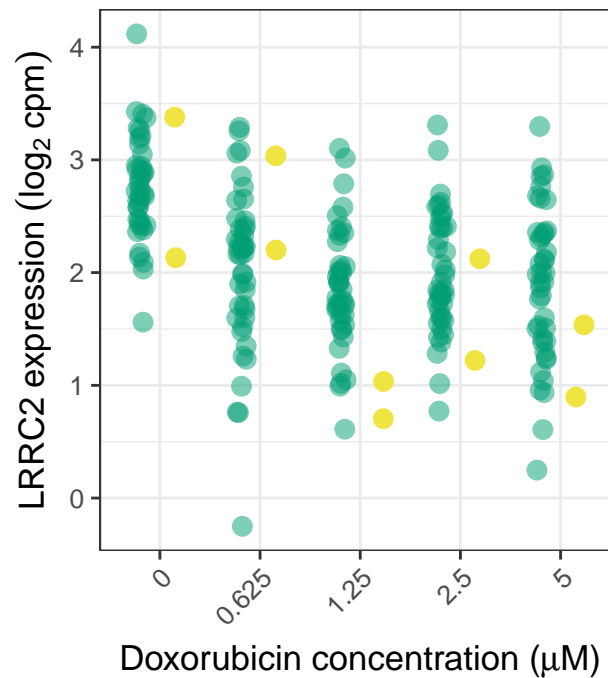Marginal eQTL  $p=2e-06$ 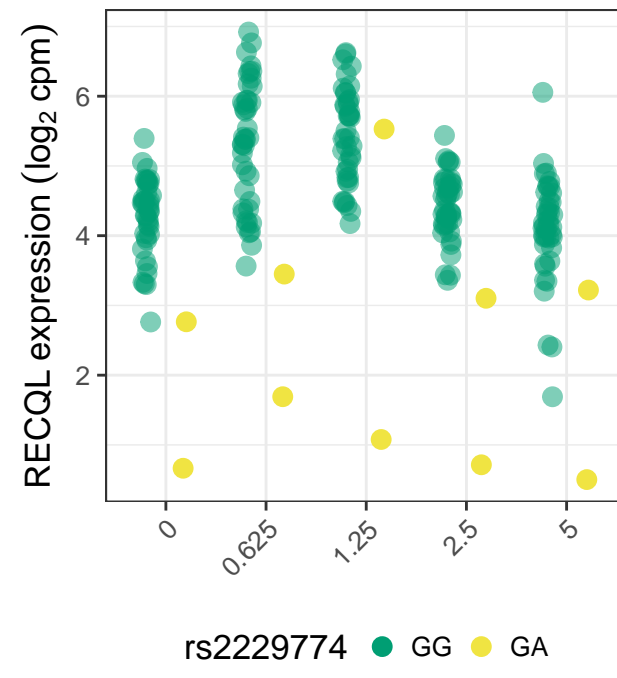

rs2229774 ● GG ● GA
