# Supplementary figures and images for: Determining the genetic basis of anthracycline-cardiotoxicity by molecular response QTL mapping in induced cardiomyocytes
Source: eLife journal article supplement (doi:10.7554/elife.33480), 2018-05-07

ABCA12 expression ( $\log_2$  cpm)

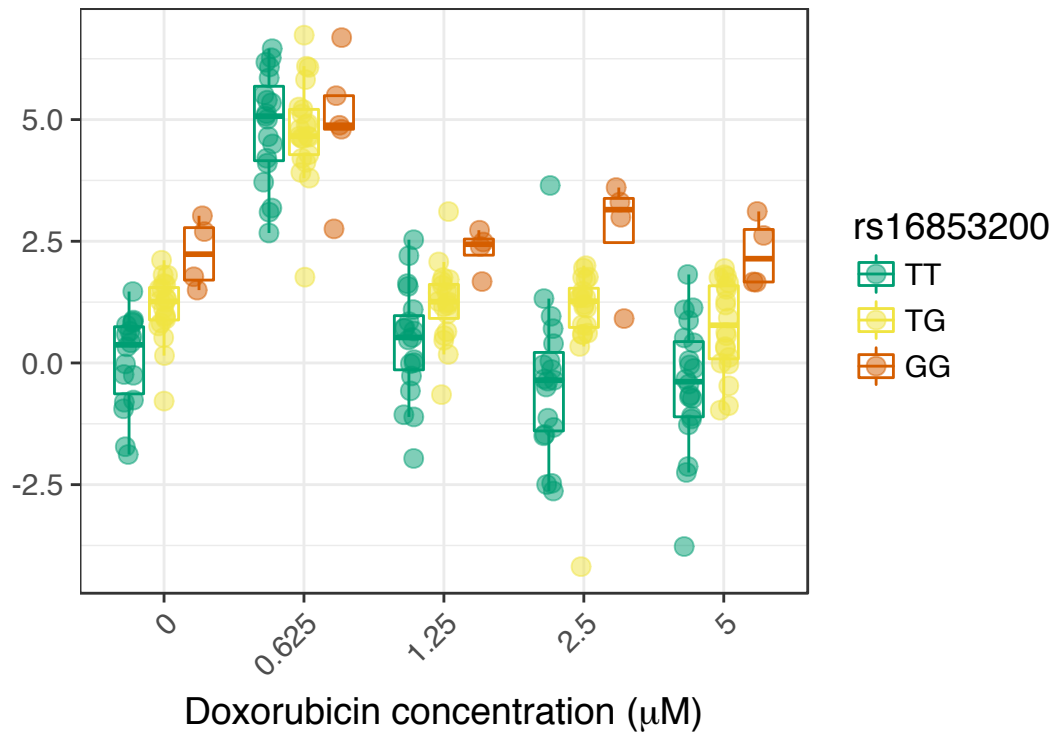

Supplement: supp [file elife-33480-supp-v1.zip]

rs11855704 TT TC CC

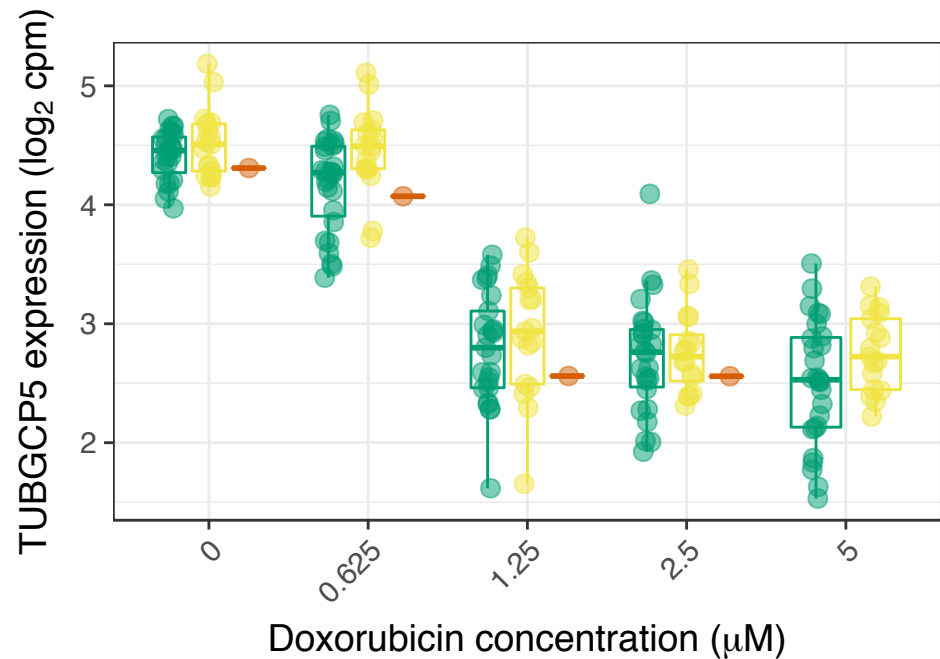

Supplement: supp [file elife-33480-supp-v1.zip]

Transcription factor

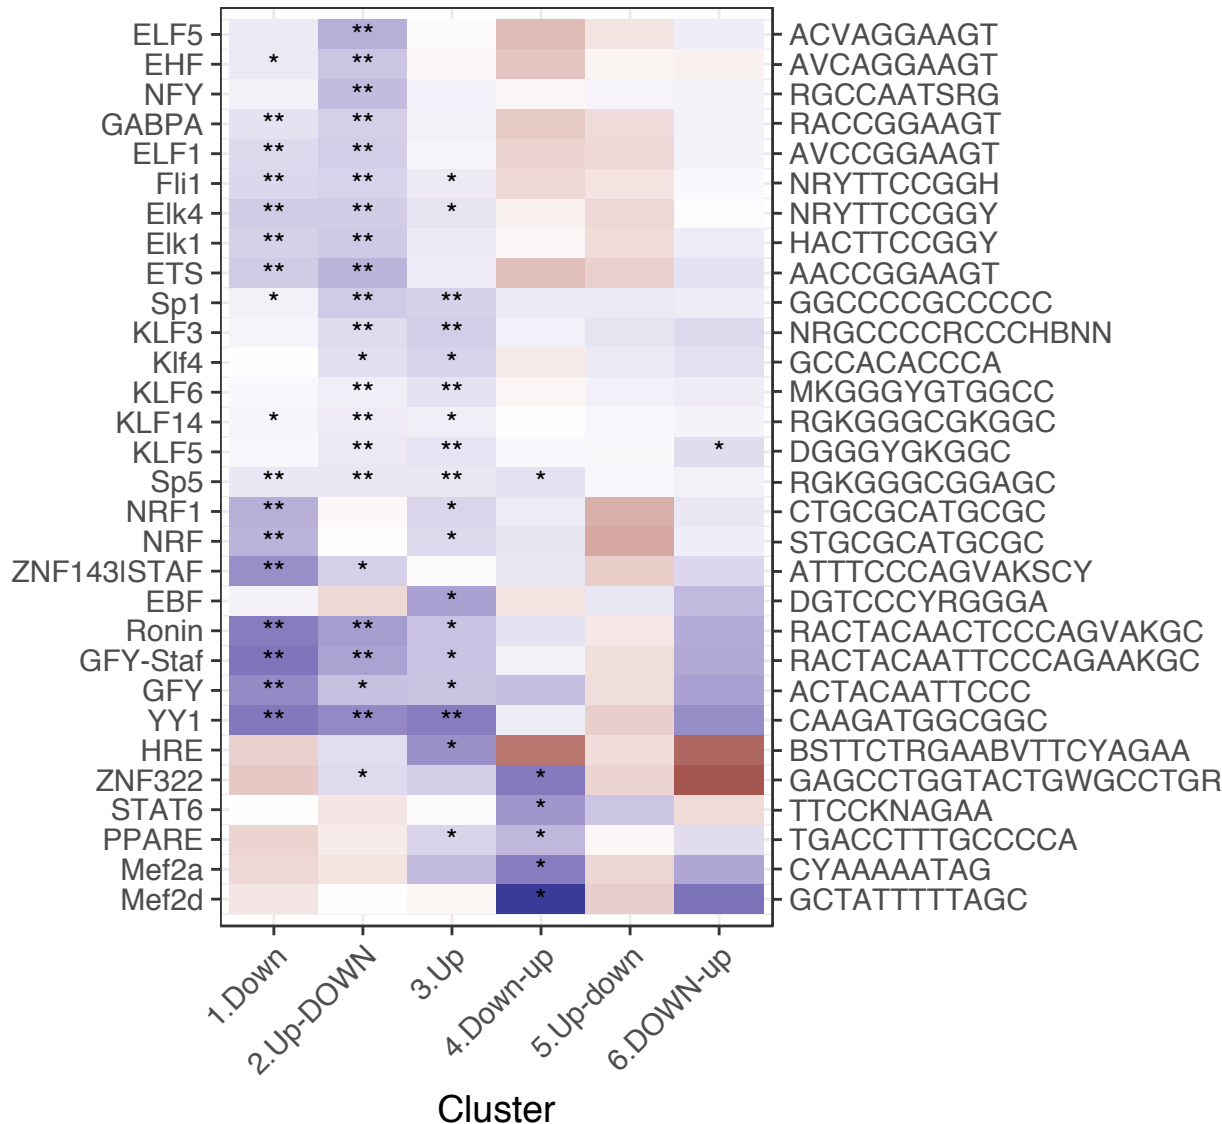

Consensus motif

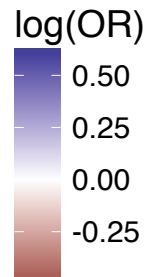

Supplement: supp [file elife-33480-supp-v1.zip]

Principal component 2

0.10  
0.05  
0.00  
-0.05  
-0.10  
-0.15

-0.2

-0.1

0.0

0.1

Principal component 1

conc

- 0
- 0.625
- 1
- 1.25

group

- DOXTOX
- DOX
- Hutterites

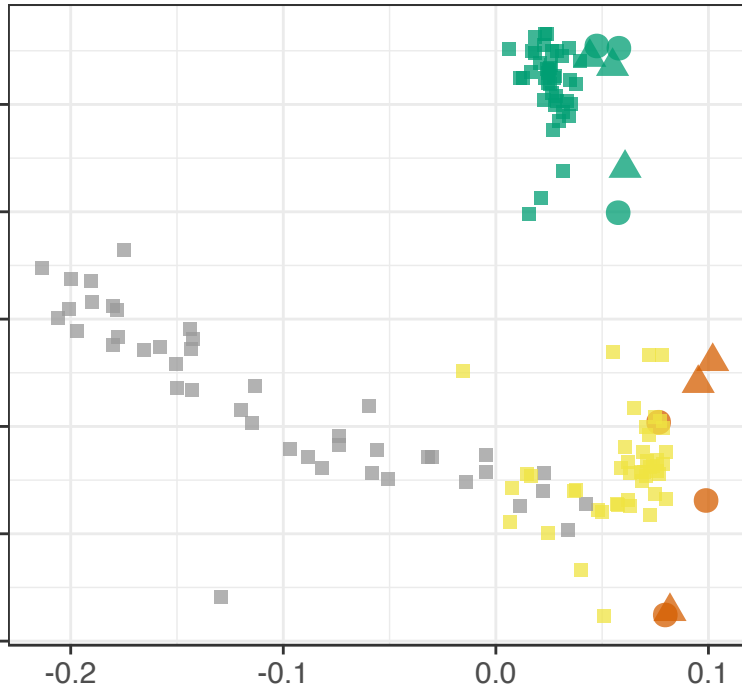

Supplement: supp [file elife-33480-supp-v1.zip]

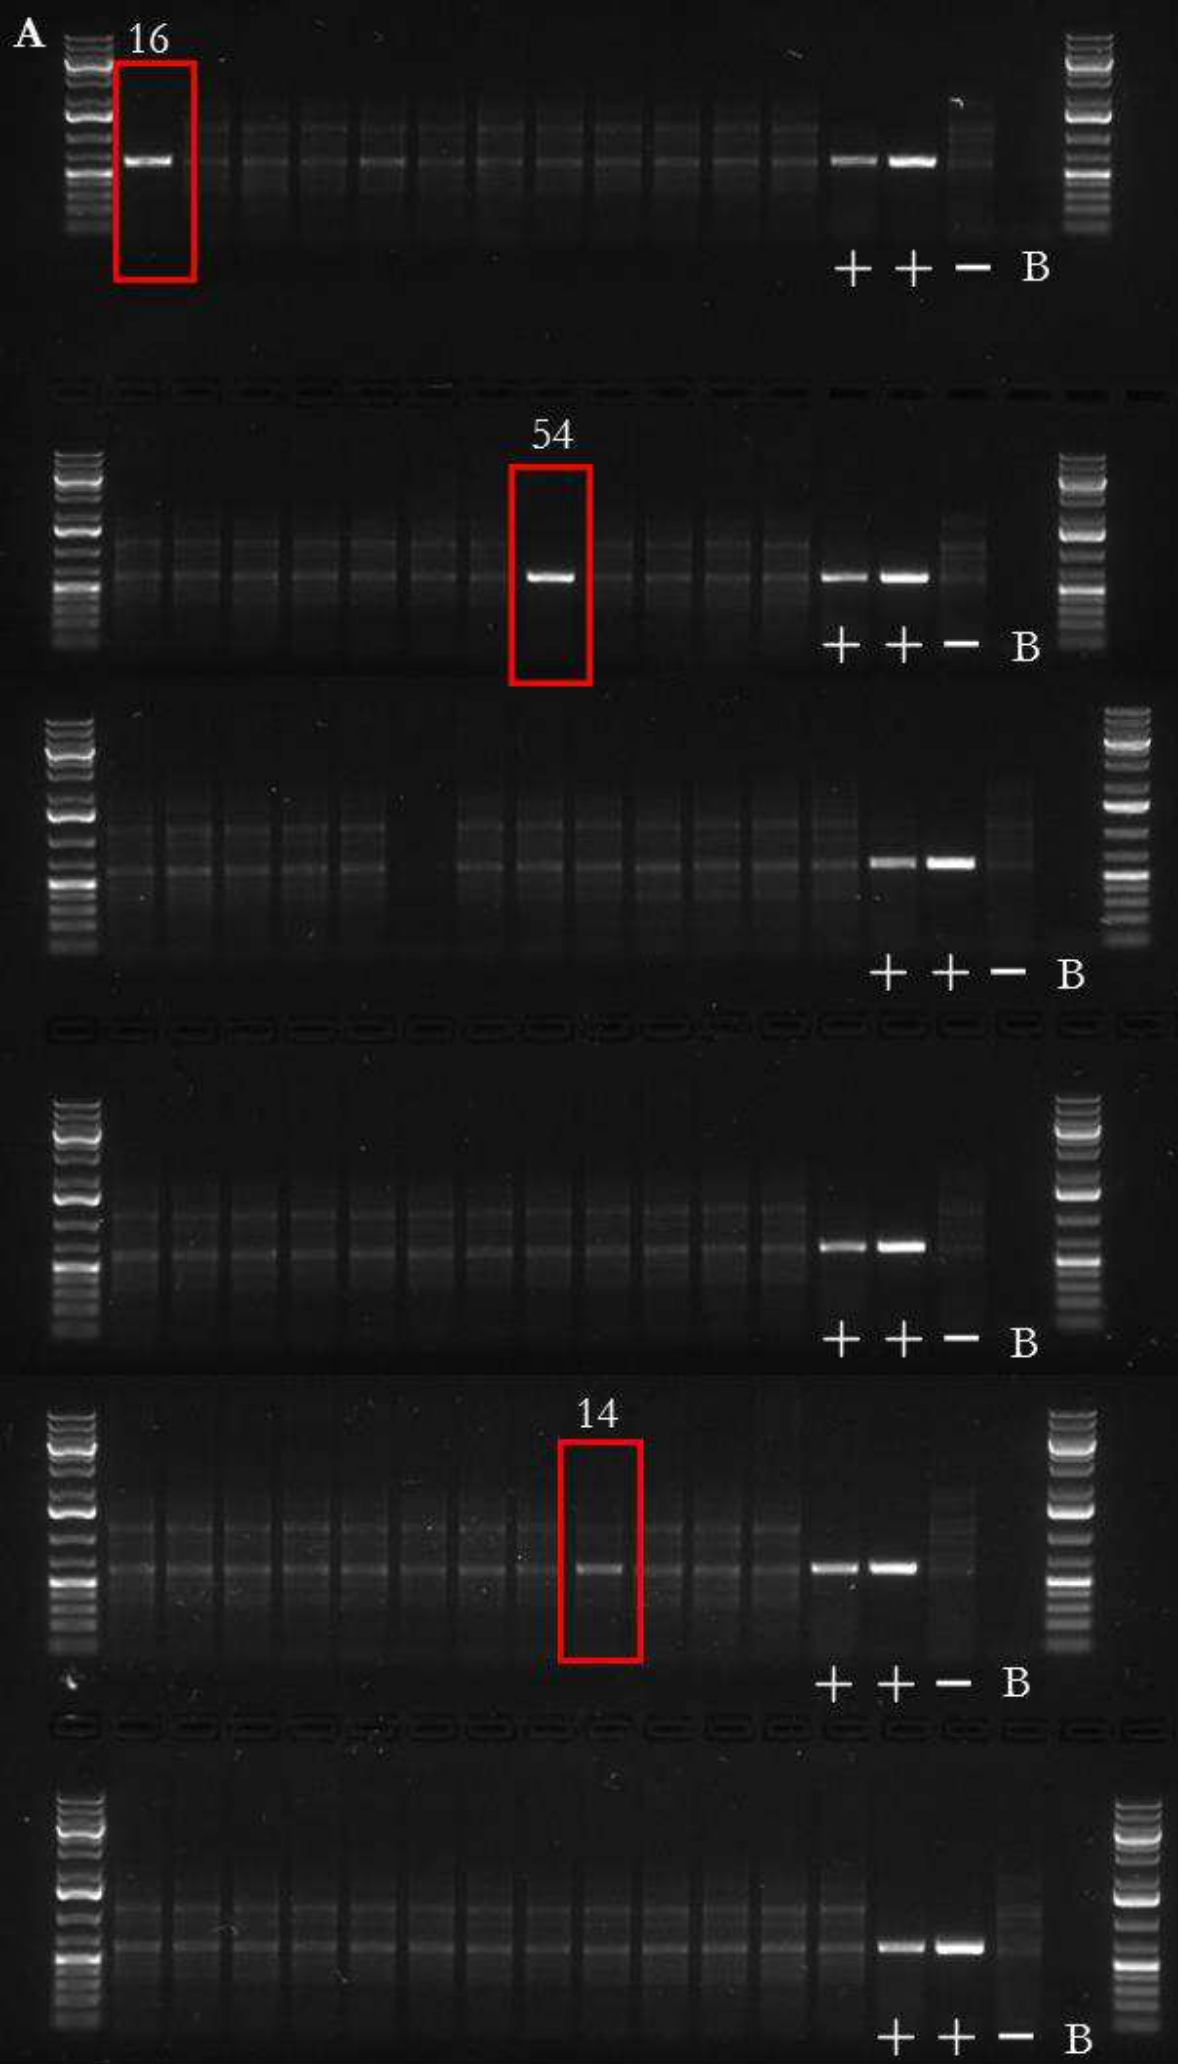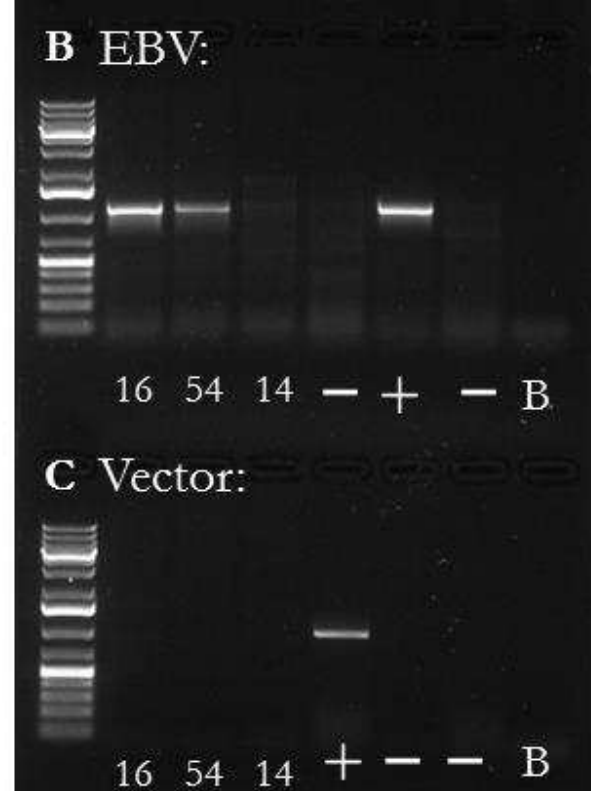

Supplement: supp [file elife-33480-supp-v1.zip]

Enrichment odds ratio

2.0  
1.5  
1.0  
0.5  
0.0

LCL

IC main effect

IC combined

IC either

IC response

sQTL type

$p=5e-12$

$p=6e-20$

$p=2e-37$

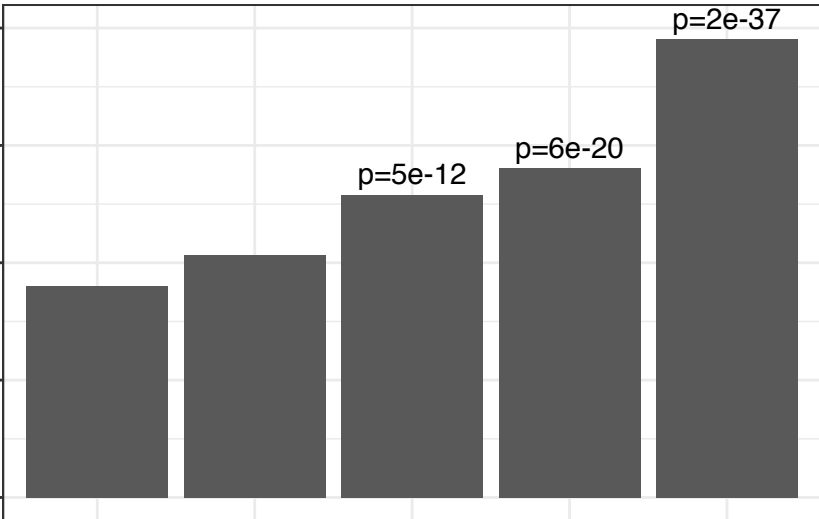

Supplement: supp [file elife-33480-supp-v1.zip]

GG|0 (n=16)

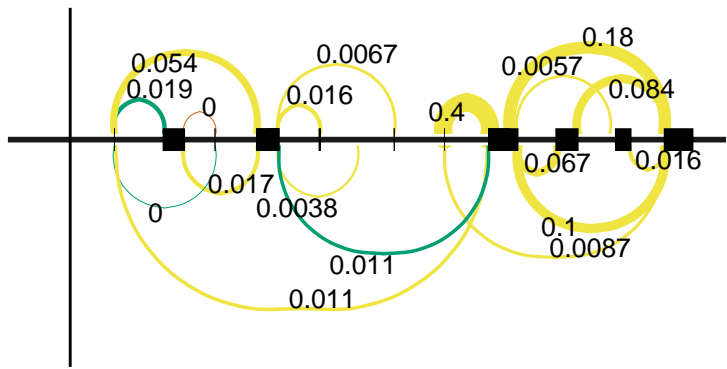

GC|0 (n=24)

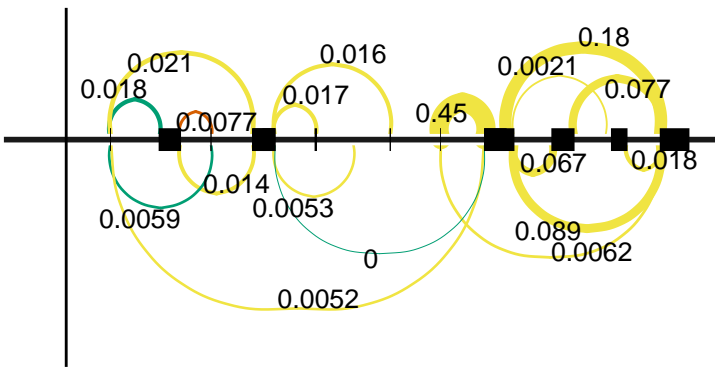

CC|0 (n=5)

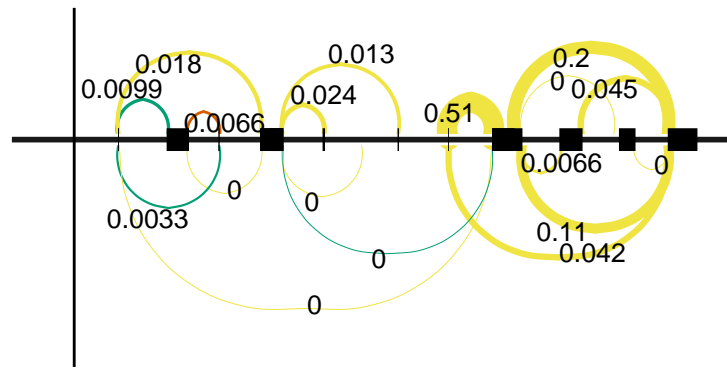

GG|0.625 (n=16)

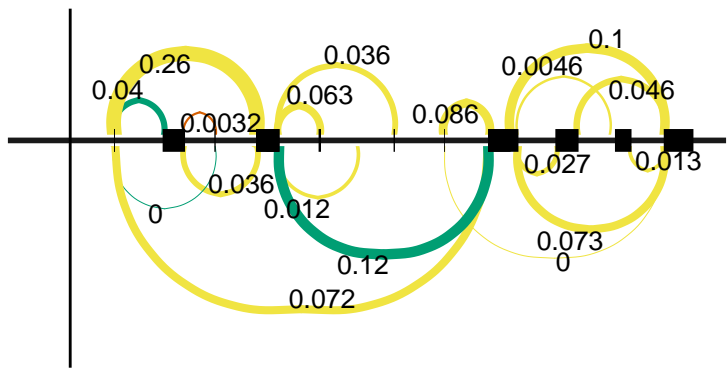

GC|0.625 (n=24)

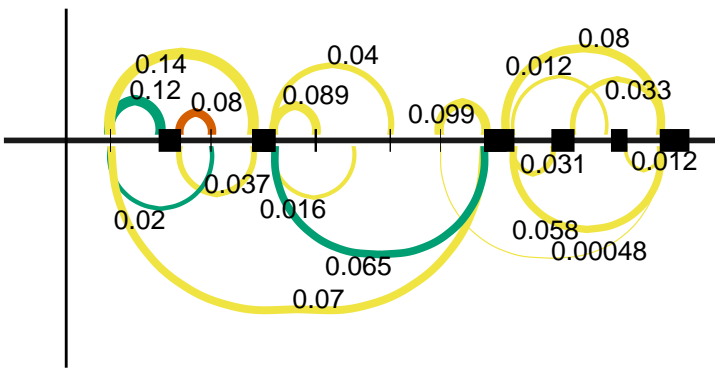

CC|0.625 (n=5)

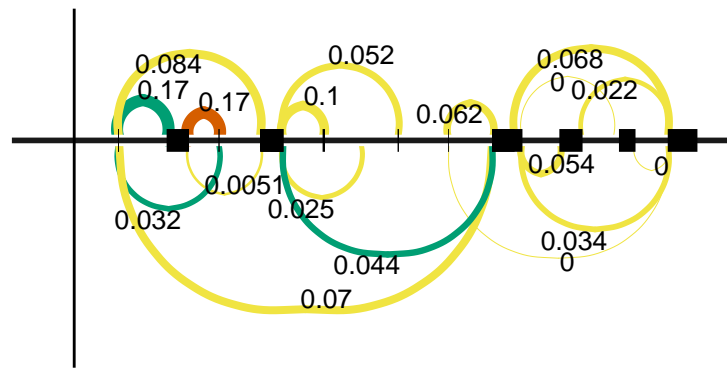

GG|1.25 (n=16)

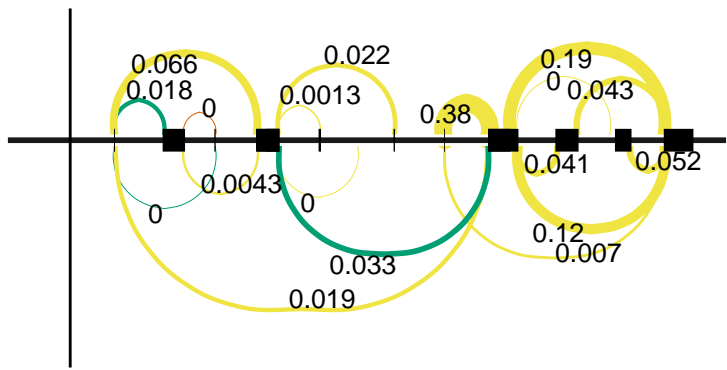

GC|1.25 (n=24)

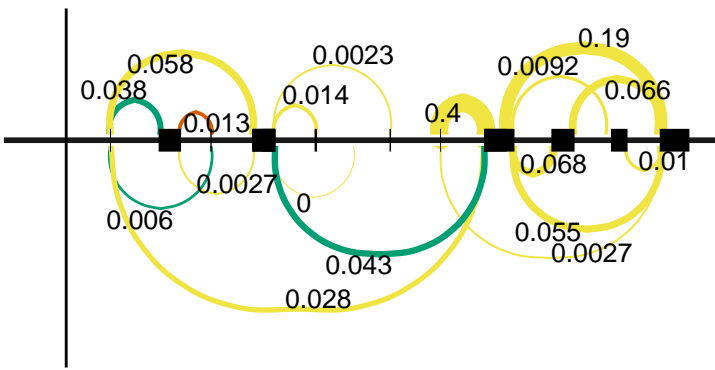

CC|1.25 (n=5)

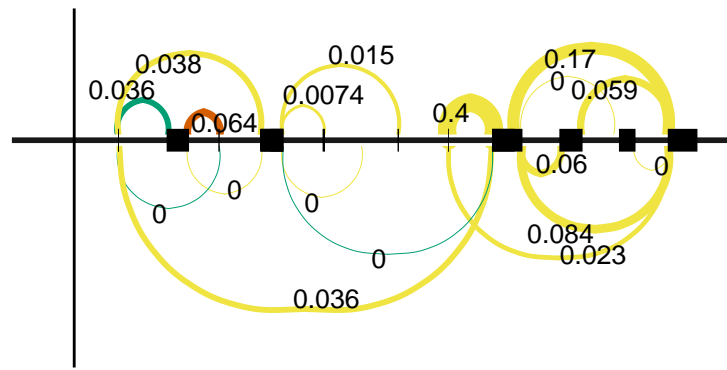

GG|2.5 (n=16)

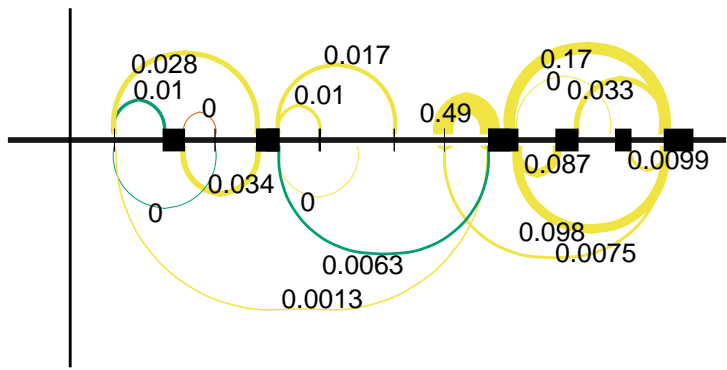

GC|2.5 (n=24)

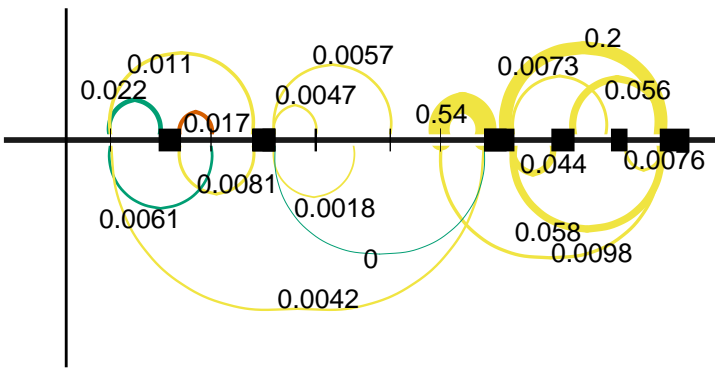

CC|2.5 (n=5)

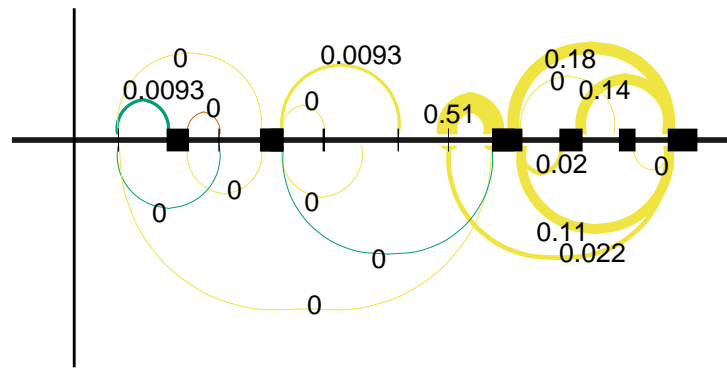

GG|5 (n=16)

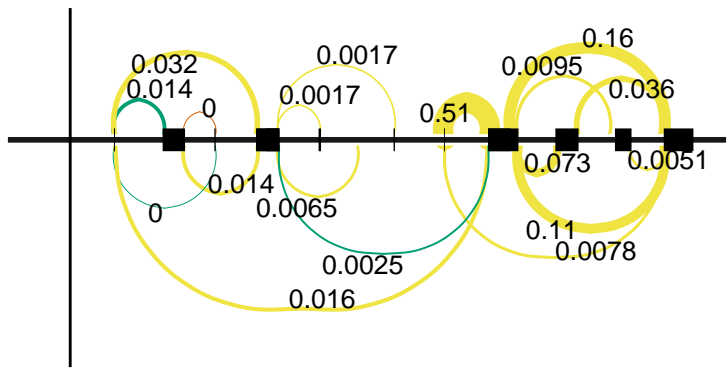

GC|5 (n=24)

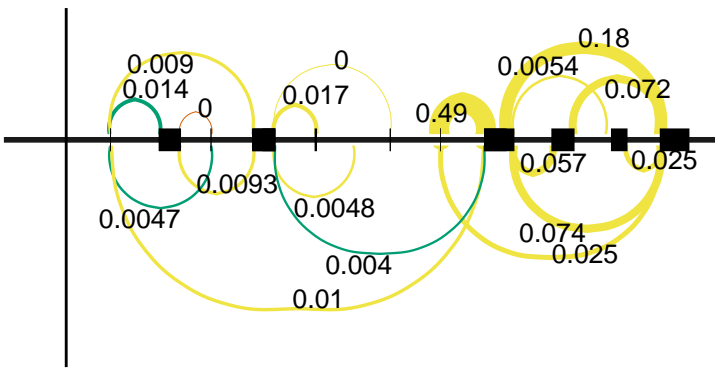

CC|5 (n=5)

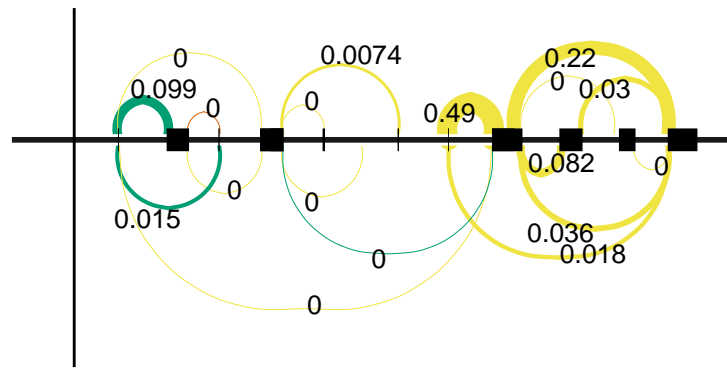

Supplement: supp [file elife-33480-supp-v1.zip]

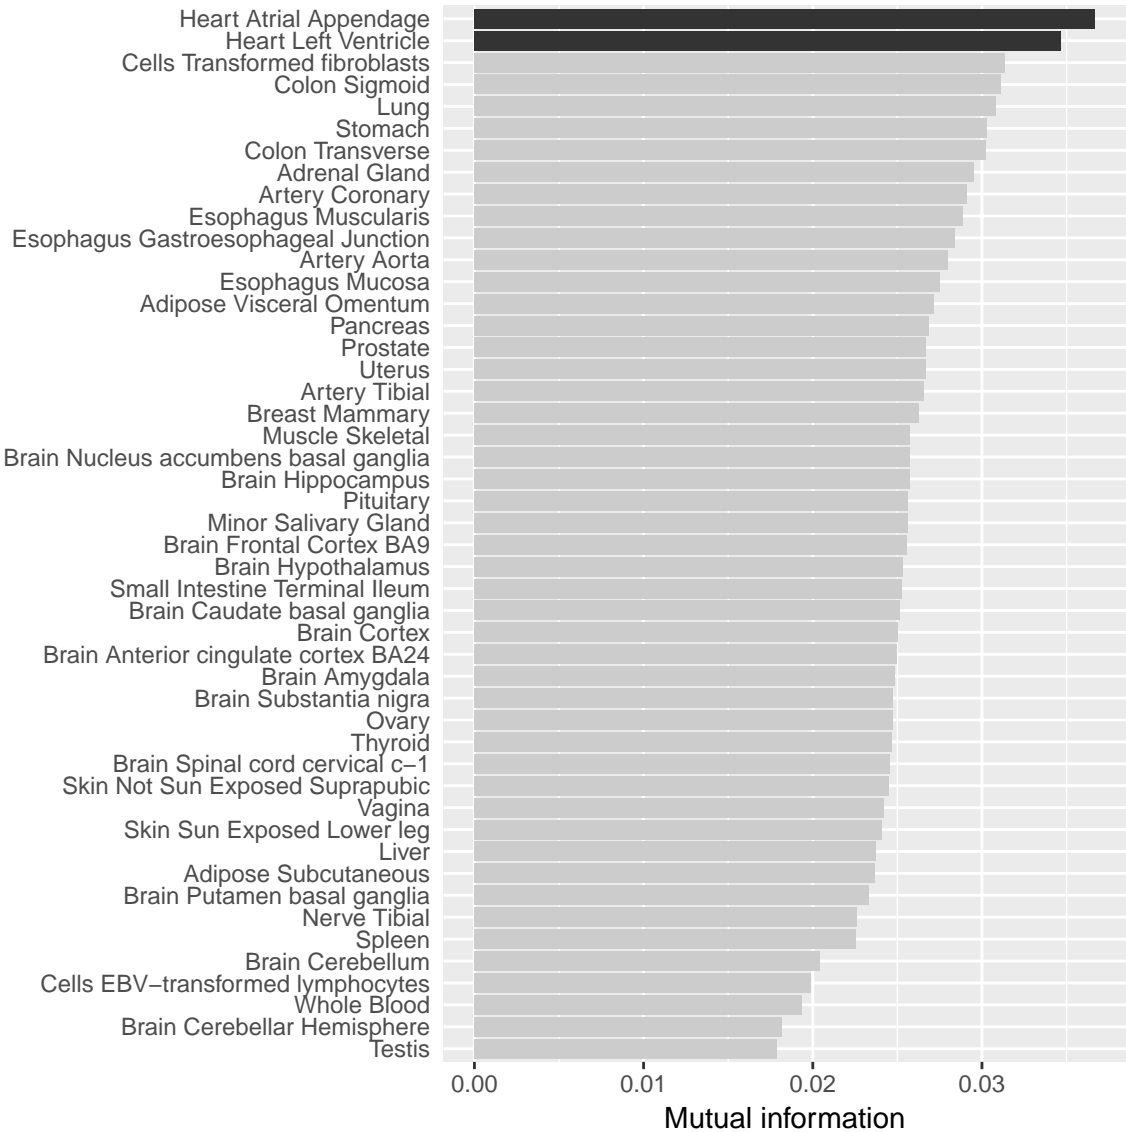

Supplement: supp [file elife-33480-supp-v1.zip]

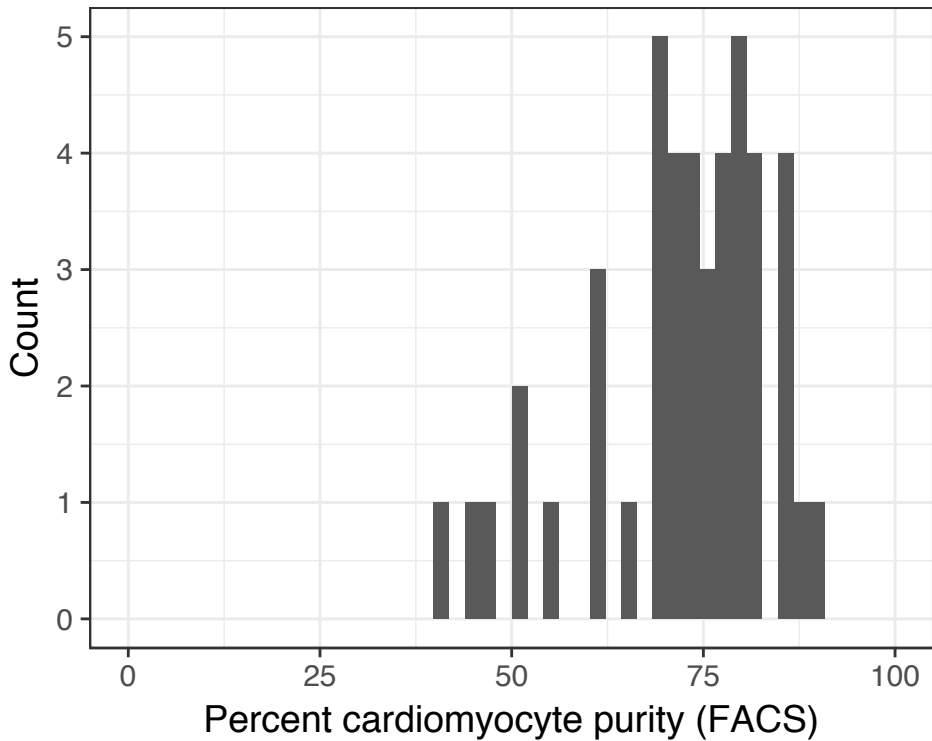

Supplement: supp [file elife-33480-supp-v1.zip]

Enrichment odds ratio

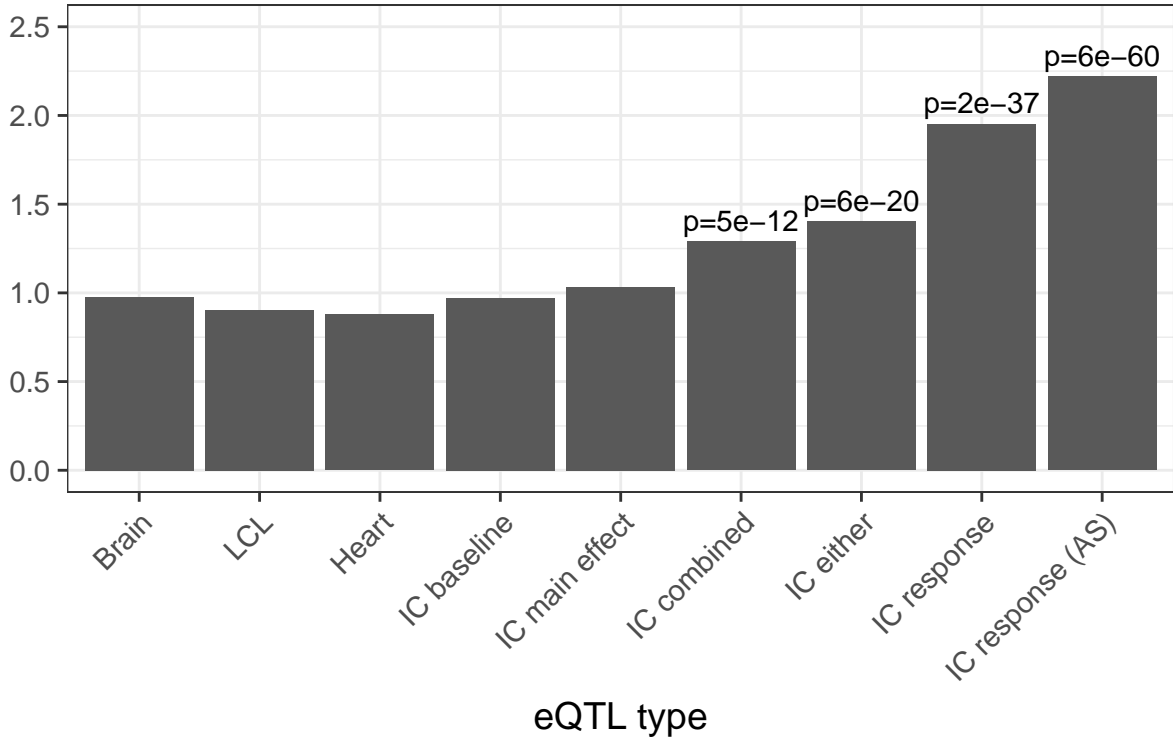

Supplement: supp [file elife-33480-supp-v1.zip]

Gene set

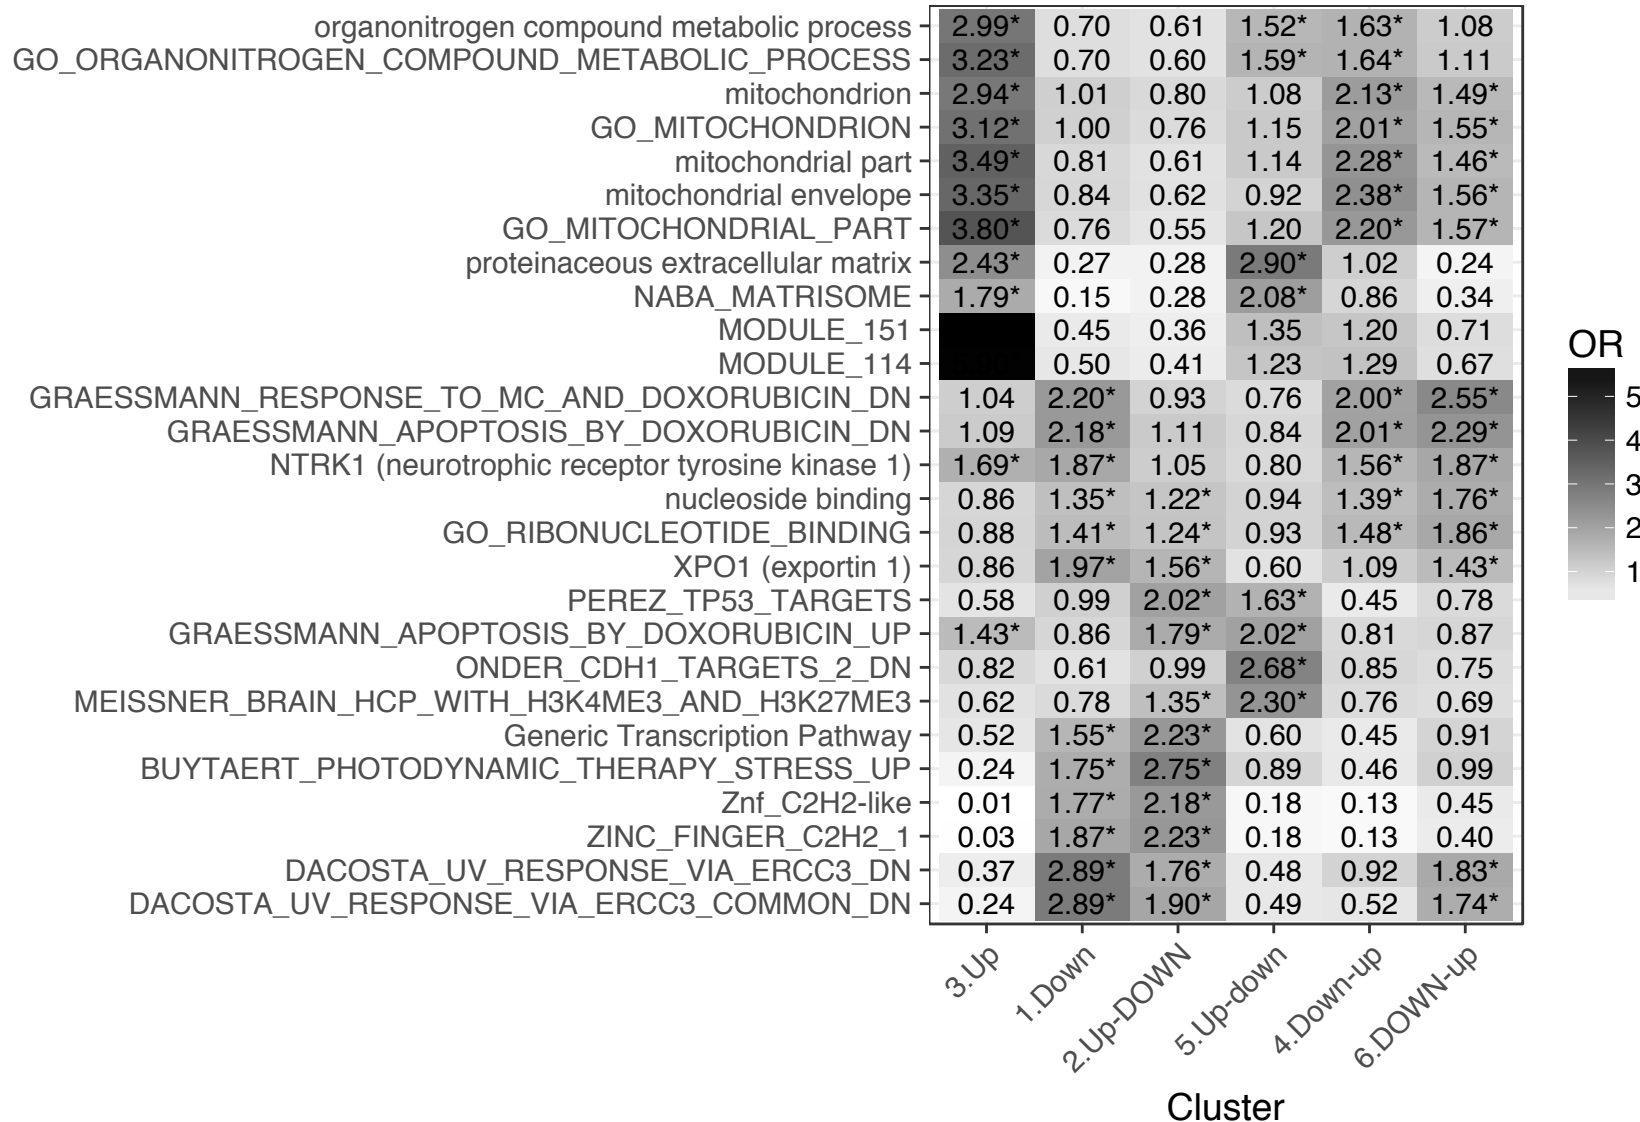

Supplement: supp [file elife-33480-supp-v1.zip]

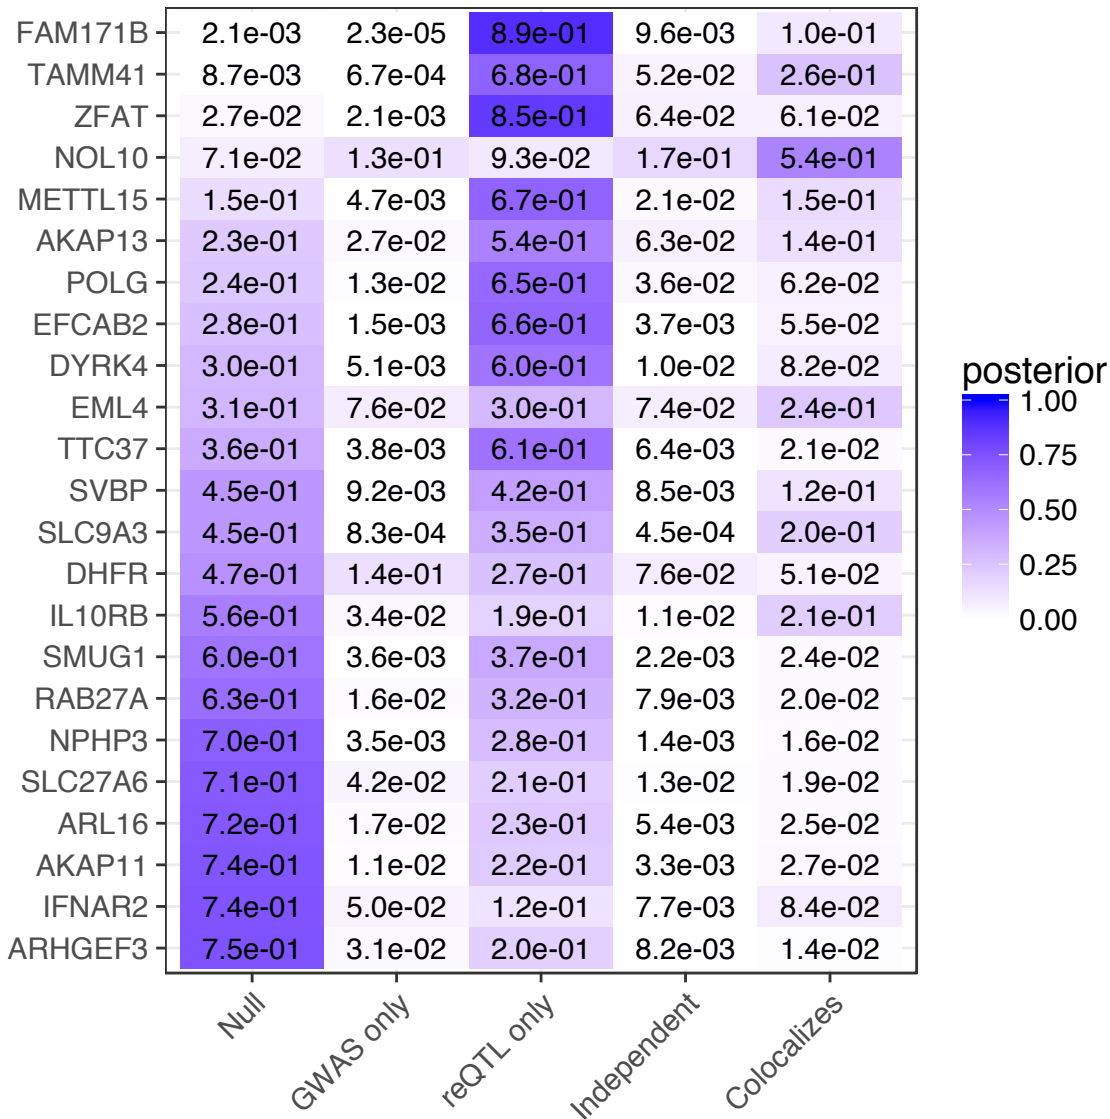

Supplement: supp [file elife-33480-supp-v1.zip]

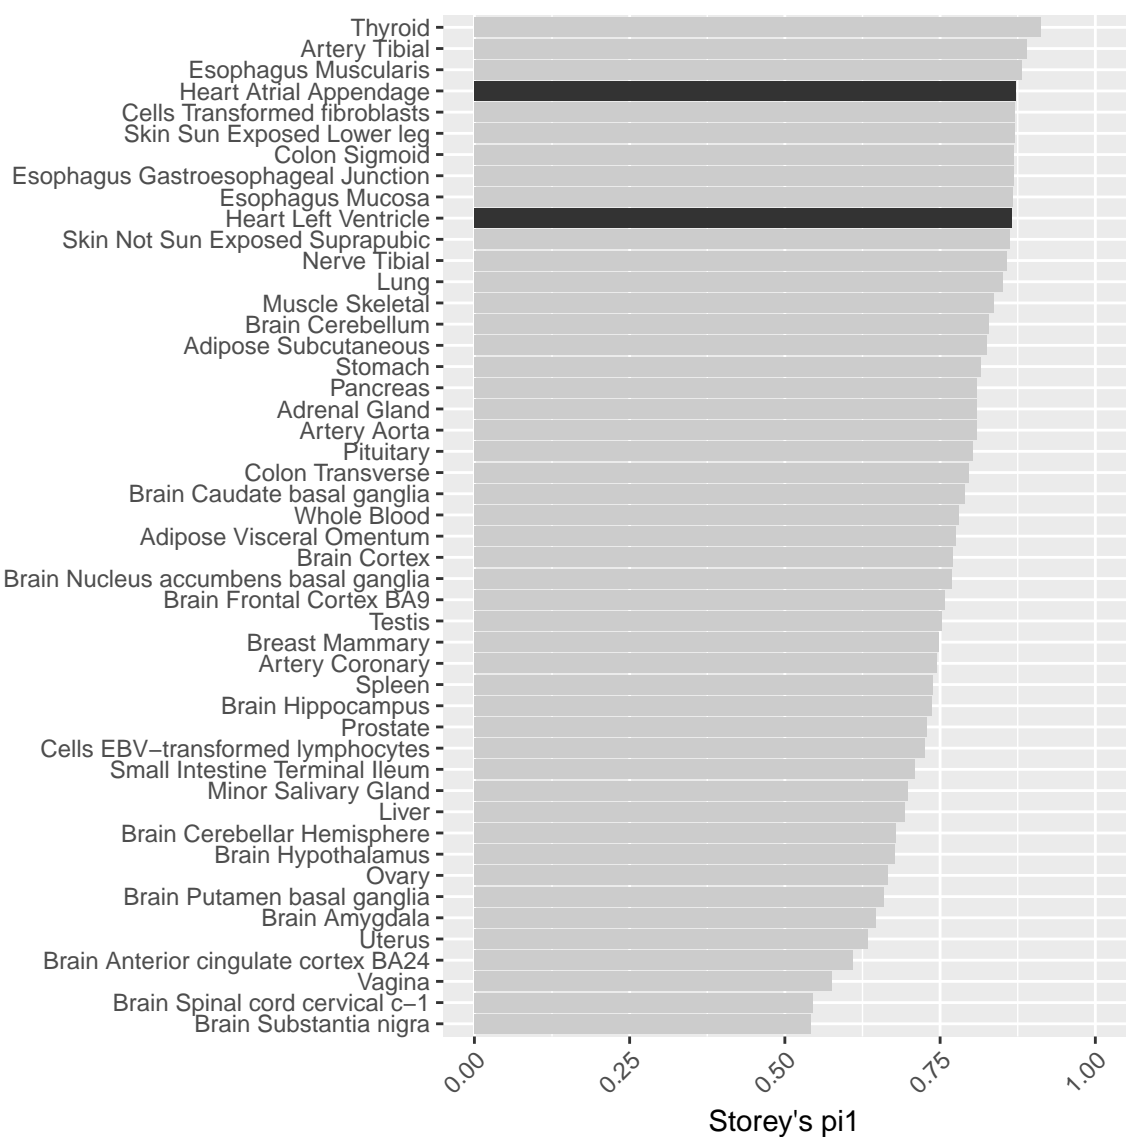

Supplement: supp [file elife-33480-supp-v1.zip]

Relative *EBNA-1* Gene Expression

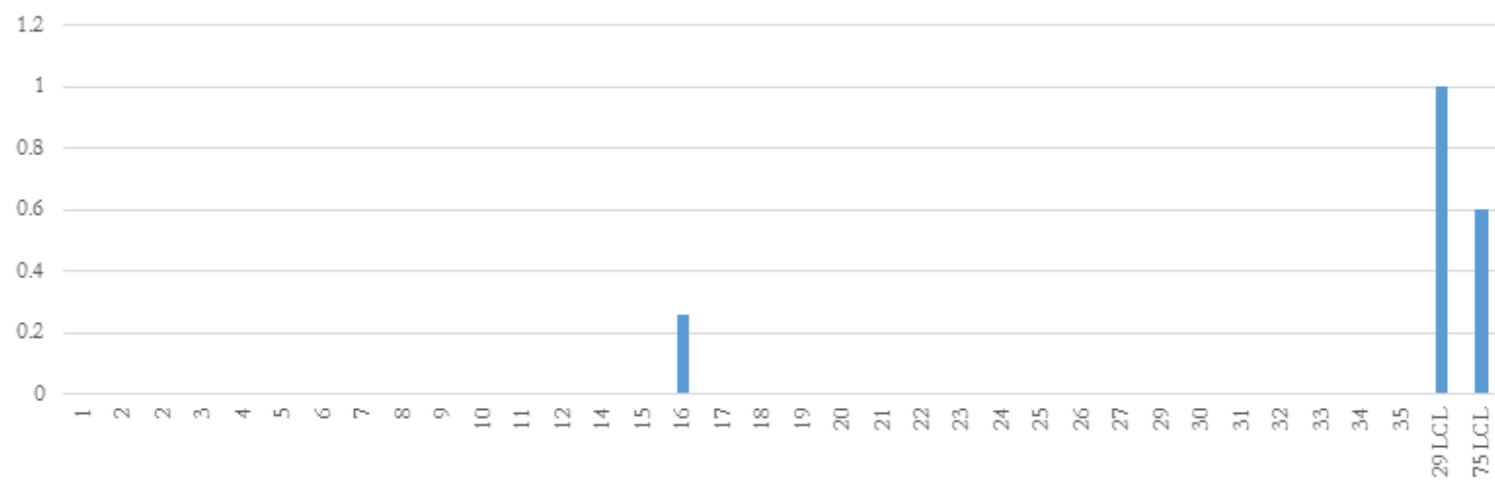

Relative *EBNA-1* Gene Expression

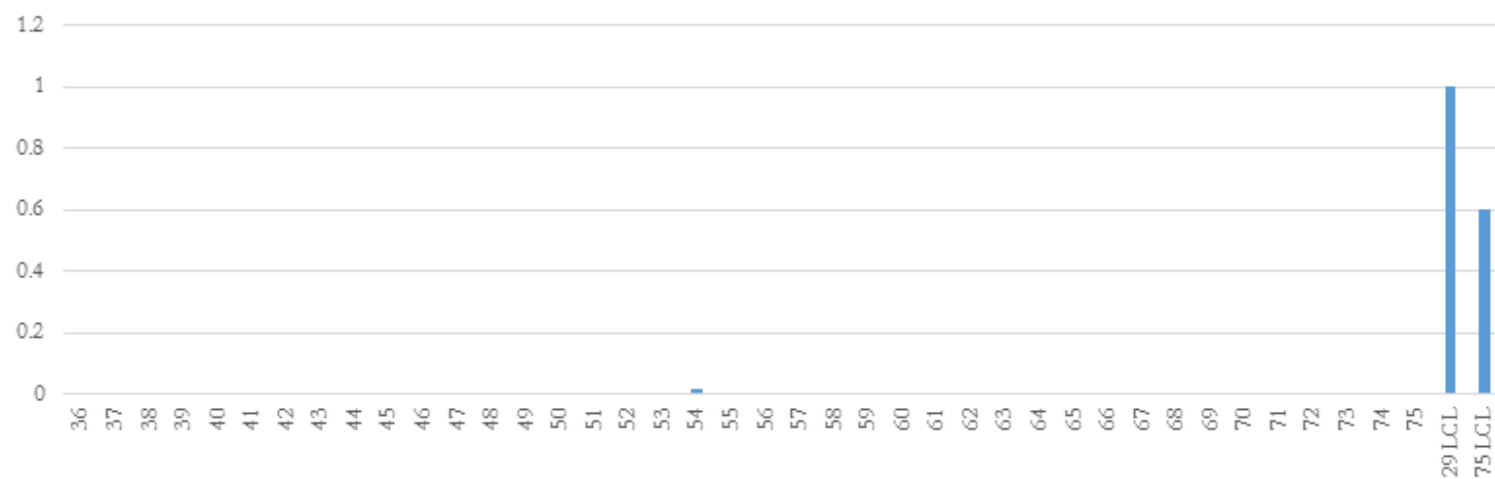

Supplement: supp [file elife-33480-supp-v1.zip]

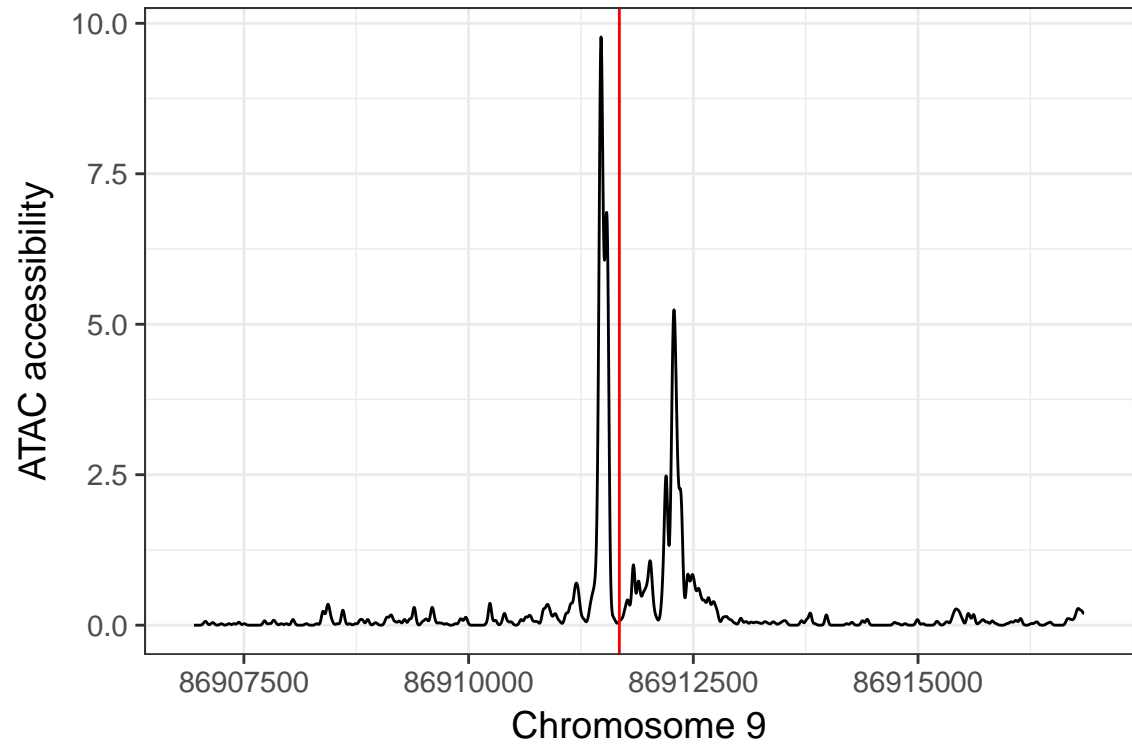

Supplement: supp [file elife-33480-supp-v1.zip]

Pluripotency Score

Hutterite iPSCs

1.5

2.0

2.5

Novelty

iPSC-CMs

20

0

-20

-40

-60

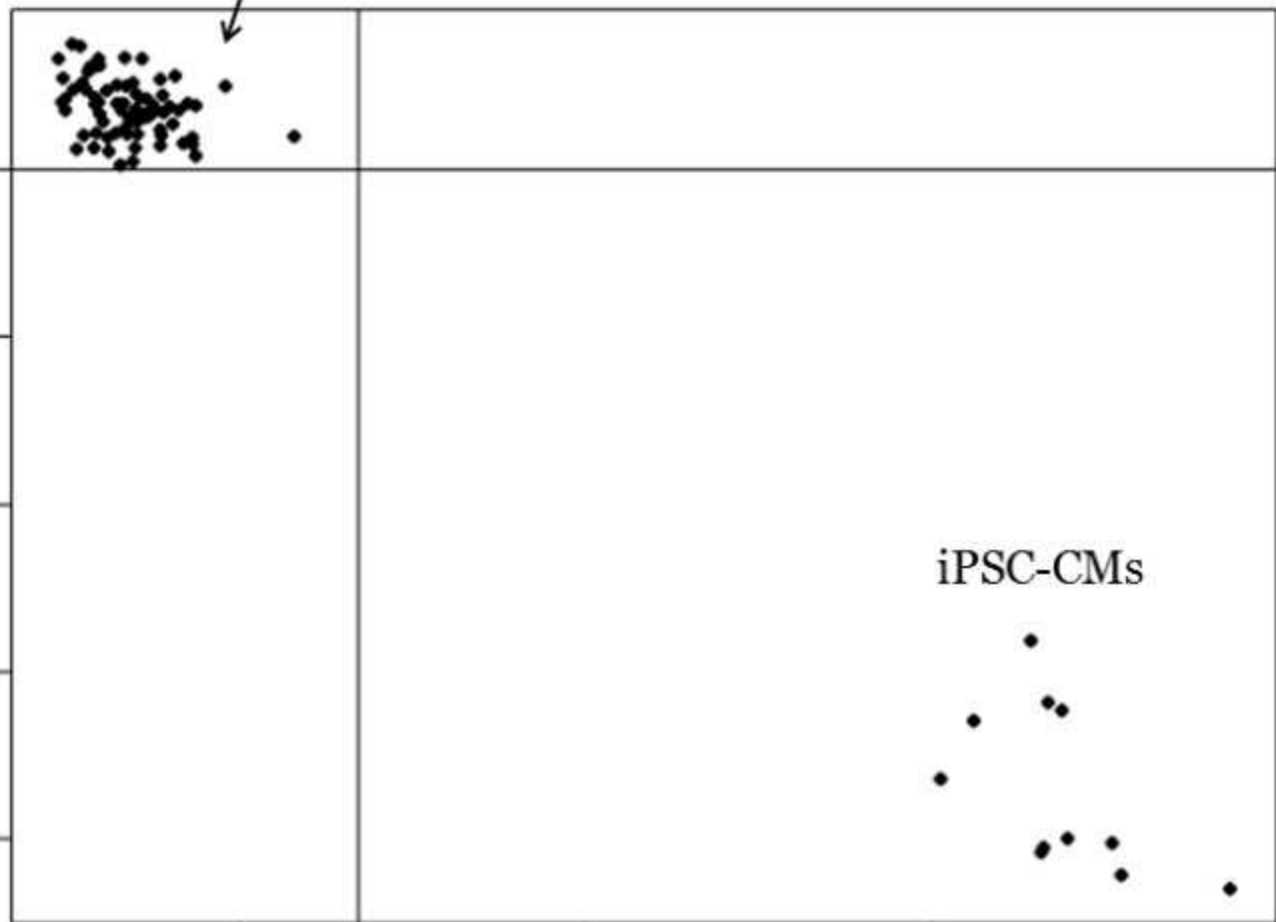

Supplement: supp [file elife-33480-supp-v1.zip]

SLC28A3 expression ( $\log_2$  cpm)

rs885004 GG GA AA

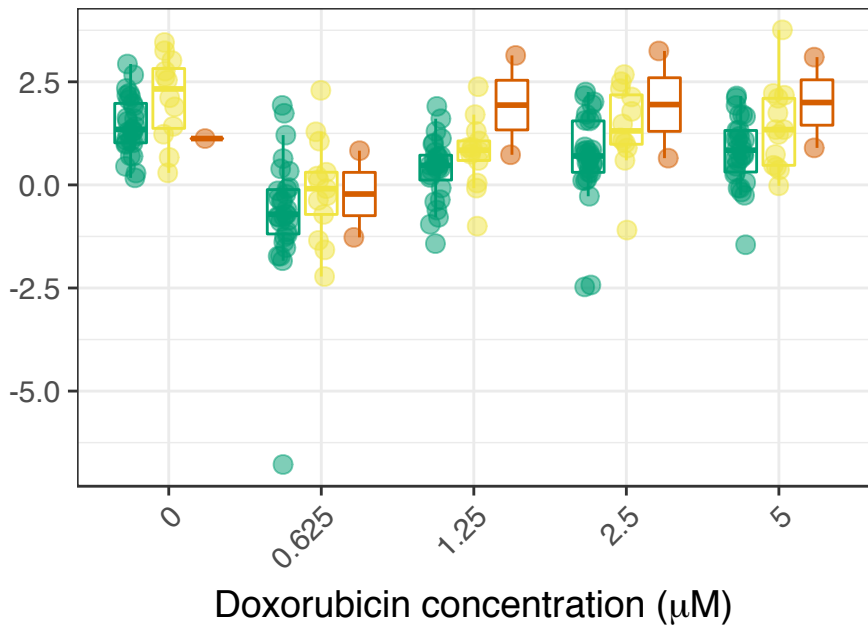

Supplement: supp [file elife-33480-supp-v1.zip]
